# Supplementary material for: Modulation of the charge transfer and photophysical properties in non-fused tetrathiafulvalene-benzothiadiazole derivatives
Source: Royal Society of Chemistry journal article supplement (doi:10.1039/c4ob02100b), 2014-11-19
Supplement: c4ob02100b1.pdf [file c4ob02100b1.pdf]

**Modulation of the charge transfer and photophysical properties in non-fused tetrathiafulvalene-benzothiadiaazole derivatives**

Flavia Pop, Sabine Seifert, Jihane Hankache, Jie Ding, Andreas Hauser, and Narcis Avarvari

**SUPPORTING INFORMATION**

## Experimental

### 4-((trimethylsilyl)ethynyl)-benzo[c][2,1,3]thiadiazole **13**

4-Bromo-benzo[c][2,1,3]thiadiazole **15** (500 mg, 2.32 mmol), CuI (44 mg, 10 %) and Pd(PPh<sub>3</sub>)<sub>4</sub> (134 mg, 5 %) were mixed in 30 mL dry THF and then diisopropylamine (DIPA) (1.37 mL, 9.74 mmol) and Si(CH<sub>3</sub>)<sub>3</sub>-acetylene (0.66 mL, 4.64 mmol) were added under argon. The resulting brown solution was heated to 60 °C and stirred for 20 h. The solvent was concentrated under vacuum and the crude product was purified by chromatography on silica using as eluent petroleum spirit/dichloromethane 4/1 to afford a light brown solid. Yield: 530 mg (98 %). <sup>1</sup>H NMR (300 MHz, CDCl<sub>3</sub>): δ = 7.98 (d, <sup>3</sup>J = 9.0 Hz, 1H, CH), 7.76 (d, <sup>3</sup>J = 6.9 Hz, 1H, CH), 7.54 (dd, <sup>3</sup>J = 8.7 Hz, <sup>3</sup>J = 6.9 Hz, 1H, CH), 0.33 (s, 9H, Si(CH<sub>3</sub>)<sub>3</sub>). MS (ESI): m/z = 232.8 (M<sup>+</sup>) (calc. 232.05).

### 4,7-bis((trimethylsilyl)ethynyl)-benzo[c][2,1,3]thiadiazole **14**

4,7-Dibromo-benzo[c][2,1,3]thiadiazole **5** (500 mg, 1.7 mmol), CuI (32 mg, 10 %) and Pd(PPh<sub>3</sub>)<sub>4</sub> (98 mg, 5 %) were mixed in 30 mL dry THF and then diisopropylamine (DIPA) (1.08 mL, 7.65 mmol) and Si(CH<sub>3</sub>)<sub>3</sub>-acetylene (0.26 mL, 1.87 mmol) were added under argon. The mixture was heated to 60 °C and stirred overnight. The solvent was concentrated under vacuum and the crude product was purified by chromatography on silica using as eluent petroleum spirit/dichloromethane 4/1 to afford a light yellow solid. Yield: 540 mg (97%). <sup>1</sup>H NMR (300 MHz, CDCl<sub>3</sub>): δ = 7.70 (s, 2H, CH), 0.32 (s, 18H, Si(CH<sub>3</sub>)<sub>3</sub>). MS (MALDI-TOF): m/z = 329.1 (M<sup>+</sup>) (calc. 328.09).

### 4-ethynyl-benzo[c][2,1,3]thiadiazole **11**

To a degassed solution of **13** (250 mg, 1.08 mmol) in 30 mL of THF/methanol (1/1), 1 M TBAF solution in THF (1.3 mL, 1.3 mmol) was added under argon. The solution was stirred for 1 h at room temperature and then the solvent was concentrated. The crude product was purified by chromatography on neutral alumina using dichloromethane as eluent to afford a light brown solid. Yield: 160 mg (92 %). <sup>1</sup>H NMR (300 MHz, CDCl<sub>3</sub>): δ = 8.04 (d, <sup>3</sup>J = 9.0 Hz, 1H, CH), 7.80 (d, <sup>3</sup>J = 6.9 Hz, 1H, CH), 7.58 (dd, <sup>3</sup>J = 8.7 Hz, <sup>3</sup>J = 6.9 Hz, 1H, CH), 3.59 (s, 1H, CH).

### 4,7-diethynyl-benzo[c][2,1,3]thiadiazole **12**

To a degassed solution of **14** (250 mg, 0.76 mmol) in 20 mL of THF/methanol (1/1), 1 M TBAF solution in THF (1.82 mL, 1.82 mmol) was added under argon. The mixture was stirred at room temperature for 1.5 h and then the solvent was concentrated. The crude product was purified by chromatography on neutral alumina using dichloromethane as eluent

to afford a light brown solid. Yield: 130 mg (93%).  $^1\text{H}$  NMR (300 MHz,  $\text{CDCl}_3$ ):  $\delta$  = 7.76 (s, 2H, CH), 3.68 (s, 2H, CH).

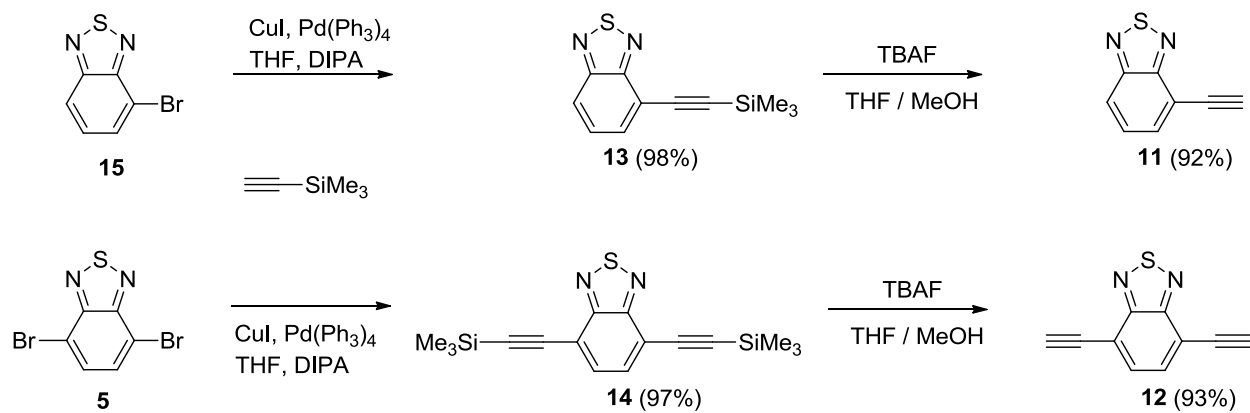

**Electrochemical studies.** Cyclic voltammetry measurements were performed in a glove box containing dry, oxygen-free (< 1 ppm) argon, using a three-electrode cell equipped with a platinum millielectrode of 0.126 cm<sup>2</sup> area, an Ag/Ag<sup>+</sup> pseudo-reference and a platinum wire counter-electrode. The potential values were then re-adjusted with respect to the saturated calomel electrode (SCE). The electrolytic media involved a 0.1 M solution of [(*n*-Bu<sub>4</sub>)N]PF<sub>6</sub> in dichloromethane and tetrahydrofuran. All experiments have been performed at room temperature at 0.1 Vs<sup>-1</sup>. Experiments have been carried out with an EGG PAR 273A potentiostat with positive feedback compensation.

**Table S1.** Redox potentials (V vs SCE) of compound **1a**, **1b**, **2a** and **3a** in CH<sub>2</sub>Cl<sub>2</sub> and of compound **4a** in THF.

| Compound  | E <sup>1</sup> <sub>1/2ox</sub> | E <sup>2</sup> <sub>1/2ox</sub> | E <sub>red</sub> (rev) |
|-----------|---------------------------------|---------------------------------|------------------------|
|           | (V vs SCE)                      | (V vs SCE)                      | (V vs SCE)             |
| <b>2a</b> | 0.40                            | 0.87                            | -1.36                  |
| <b>3a</b> | 0.42                            | 0.88                            | -1.19                  |
| <b>1a</b> | 0.42                            | 0.83                            | -1.19                  |
| <b>1b</b> | 0.45                            | 0.82                            | -1.21                  |
| <b>4a</b> | 0.47                            | 0.89                            | -1.17                  |

## UV-Vis spectroscopy

**Table S2.** UV-Vis data for **1a**, **1b**, **2a**, **3a** ( $10^{-4}$  M in CH<sub>2</sub>Cl<sub>2</sub>), and **4a** ( $5 \times 10^{-5}$  M in THF).

| Compound  | $\lambda$ (nm) | $\epsilon$ (L/mol*cm) |
|-----------|----------------|-----------------------|
| <b>2a</b> | 481            | 3300                  |
| <b>3a</b> | 501            | 3500                  |
| <b>1a</b> | 565            | 3530                  |
| <b>1b</b> | 551            | 3900                  |
| <b>4a</b> | 609            | 4360                  |
